# Supplementary material for: Organogermanium THGP Induces Differentiation into M1 Macrophages and Suppresses the Proliferation of Melanoma Cells via Phagocytosis
Source: MDPI journal article supplement (doi:10.3390/ijms24031885), 2023-01-18
Supplement: s1 [file s1]

## Supplementary Figure Legends

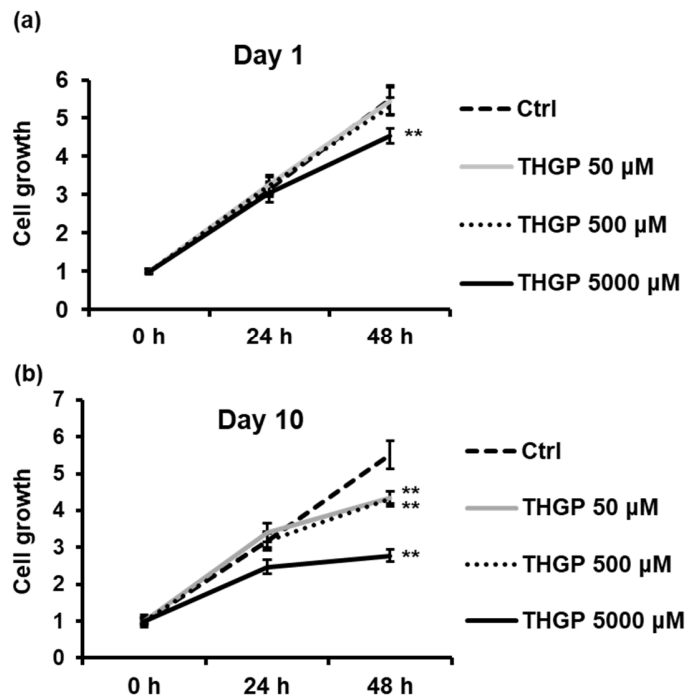

**Figure S1. Growth of RAW 264.7 cells cultured with 50-5000  $\mu$ M THGP.**

The growth of RAW 264.7 cells cultured with 0-5000  $\mu$ M THGP for 1 day (a) or 10 days (b) was analyzed using the MTS assay. \*\*  $p < 0.01$ .

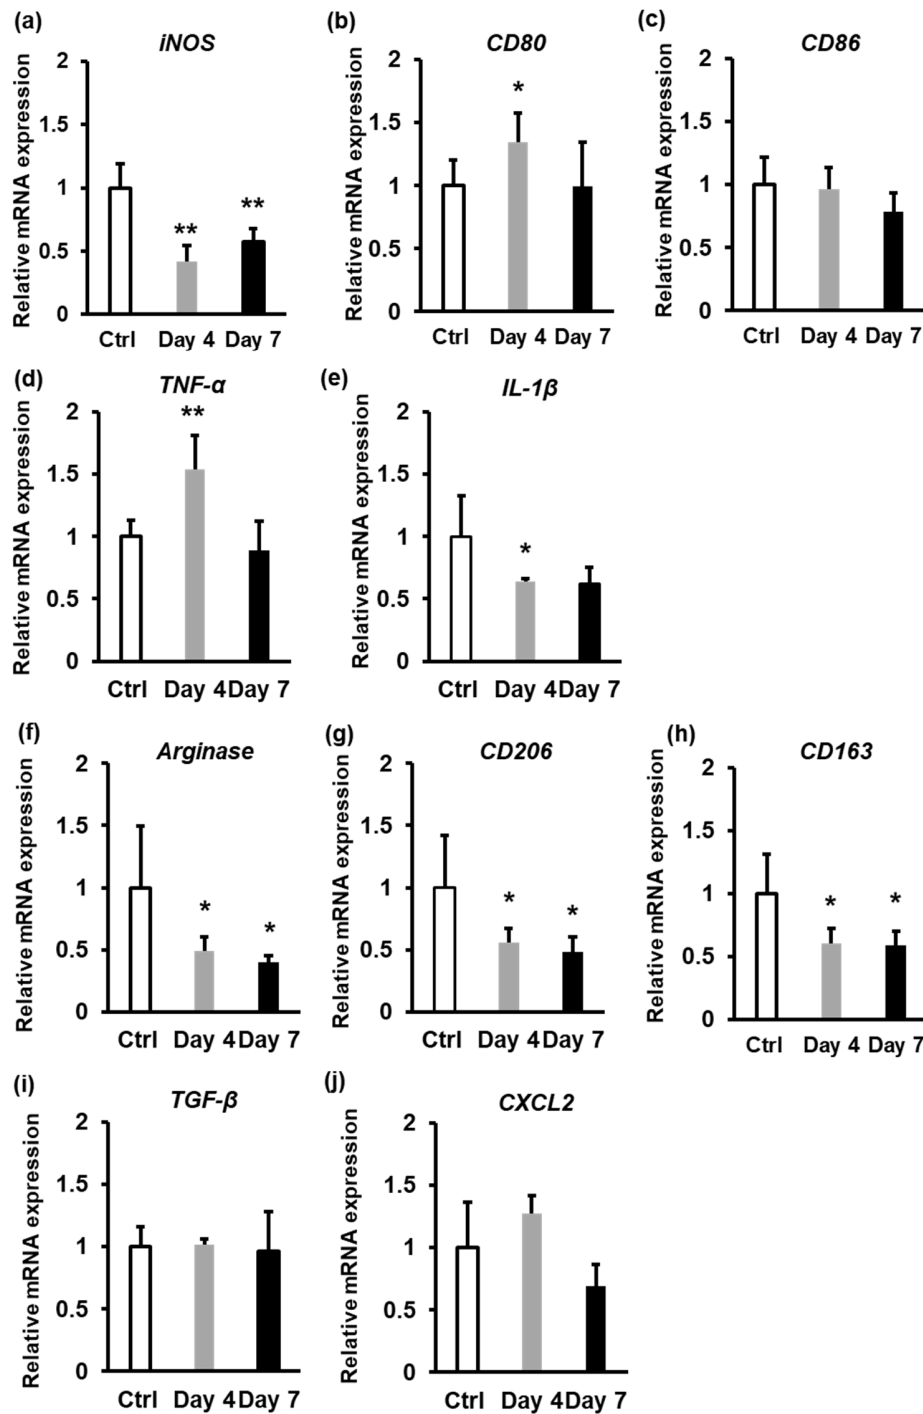

**Figure S2. Expression of M1 or M2 markers in RAW 264.7 cells treated with THGP.**

The expression of M1 markers (iNOS, CD80, CD86, TNF-α, and IL-1β) (a-e) or M2 markers (arginase, CD206, CD163, TGF-β, and CXCL2) (f-j) in RAW 264.7 cells

cultured with 500  $\mu$ M THGP for 4 or 7 days was analyzed using RT-PCR. \*  $p < 0.05$ , \*\*  $p < 0.01$ .

**Figure S3. Expression of M1/M2 markers in macrophages from mice fed Ge-132**

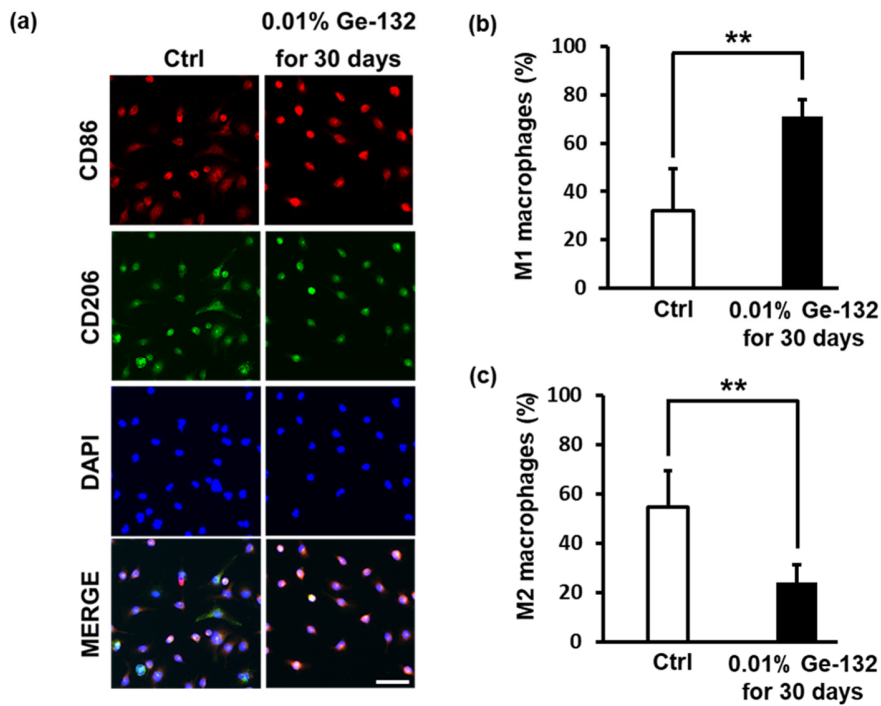

(a) Photographs showing immunofluorescence staining for CD86 (green) and CD206 (red) along with DAPI (blue) in mice fed a control diet or a 0.01% Ge-132 diet for 30 days. Scale bars: 20  $\mu$ m. (b) M1 macrophages showed high expression of CD86 and low expression of CD206 in (a). (c) M2 macrophages with low expression of CD86 and high expression of CD206 in (a)  $n=6$ . \*\*  $p < 0.01$  compared with the controls.

**Table S1. Sequences of PCR primers.**

Primers used for RT–PCR.

|                                | <b>Forward (5'→3')</b>  | <b>Reverse (5'→3')</b>  |
|--------------------------------|-------------------------|-------------------------|
| <b>iNOS</b>                    | CCCTTCAATGGTTGGTACATGG  | ACATTGATCTCCGTGACAGCC   |
| <b>CD80</b>                    | TGTCCAAGGCTCATTCTTCTC   | TAACGGCAAGGCAGCAATA     |
| <b>CD86</b>                    | AGCACGGACTTGAACAACCA    | TGTAAATGGGCACGGCAGAT    |
| <b>TNF-<math>\alpha</math></b> | TCAGCCTCTTCTCCTTCCTG    | GGCTACAGGCTTGTCACTCG    |
| <b>Arginase</b>                | CTCCAAGCCAAAGTCCTTAGA   | AGGAGCTGTCATTAGGGACATC  |
| <b>CD163</b>                   | CTGGCGGGTGGTGAAAACA     | CAGCCGTTACTGCACACTG     |
| <b>CD206</b>                   | CTCTGTTCACTATTGGACGC    | CGGAATTTCTGGGATTCACTTC  |
| <b>CD47</b>                    | ATGCTTCTGGACTTGGCCTC    | CCGACCAAAGCAAGGACGTA    |
| <b>SIRPA</b>                   | CCACGGGGAAGGAAGTGAAG    | ACGTATTCTCCTGCGAAACTGTA |
| <b>IL-1<math>\beta</math></b>  | GCCTCGTGCTGTCTGGACC     | TGTCGTTGCTTGGTTCTCCTTG  |
| <b>TGF-<math>\beta</math></b>  | ATTCCTGGCGTTACCTTGG     | AGCCCTGTATTCCGTCTCCT    |
| <b>CXCL2</b>                   | CCCAGACAGAAGTCATAGCCAC  | GCCTTGCCTTTGTTCACTATC   |
| <b>RPS18</b>                   | TTCTGGCCAACGGTCTAGACAAC | CCAGTGGTCTTGGTGTGCTGA   |

**Table S2. Microarray analysis.**

Genes exhibiting more than a 4-fold increase or decrease in expression and a p value < 0.01 in the THGP-treated group compared to the control group are shown when analyzed using the microarray in Figure 3b. The data are shown as a Microsoft Excel file.

| GO ID    | Description | LogP | Enrichment | Z score | Gene no. in GO | No. of genes in GO and hitlist | No. of upregulated genes in GO and hitlist | No. of downregulated genes in GO and hitlist |
|----------|-------------|------|------------|---------|----------------|--------------------------------|--------------------------------------------|----------------------------------------------|
| TRR00951 | Nfkb1       | -6.5 | 3.6        | 6.5     | 246            | 22                             | 6                                          | 16                                           |
| TRR01204 | Runx1t1     | -4.2 | 3.0        | 9.3     | 4              | 3                              | 2                                          | 1                                            |
| TRR00652 | Jun         | -3.8 | 3.2        | 4.7     | 175            | 14                             | 5                                          | 9                                            |
| TRR01494 | Trp53       | -3.7 | 3.1        | 4.5     | 182            | 14                             | 5                                          | 9                                            |
| TRR00331 | Etv4        | -3.4 | 1.1        | 6       | 15             | 4                              | 1                                          | 3                                            |
| TRR01347 | Sp1         | -3.3 | 2.3        | 3.9     | 371            | 21                             | 6                                          | 15                                           |
| TRR00944 | Nfe2l2      | -3.3 | 4.9        | 4.7     | 57             | 7                              | 4                                          | 3                                            |
| TRR00327 | Ets1        | -2.9 | 4.3        | 4.3     | 65             | 7                              | 4                                          | 3                                            |
| TRR01190 | Rela        | -2.8 | 2.9        | 3.7     | 153            | 11                             | 3                                          | 8                                            |
| TRR00293 | Egr1        | -2.7 | 3.2        | 3.8     | 111            | 9                              | 1                                          | 7                                            |

**Table S3. TRRUST microarray analysis.**

The table shows the results from the TRRUST analysis of genes showing a 4-fold increase or decrease in expression and p value < 0.01 in the THGP-treated group compared with the control group.

**Movies. Movies showing cocultures of RAW 264.7 and B16 4A5 cells.**

Two time-lapse videos captured from the coculture of RAW C (Movie S1) or RAW T (Movie S2) cells with B16 4A5 cells for 72 hours. The two other videos show magnified views of RAW C (Movie S3) or RAW T (Movie S4) cells phagocytosing B16 4A5 cells in Movie S1 or Movie S2, respectively.
